# Supplementary material for: Fitness Cost Associated With Enhanced EPSPS Gene Copy Number and Glyphosate Resistance in an Amaranthus tuberculatus Population
Source: Front Plant Sci. 2021 Jun 29;12:651381. doi: 10.3389/fpls.2021.651381 (PMC8276266; doi:10.3389/fpls.2021.651381)
Supplement: Supplementary Table 1 — Primer sequences for qPCR. [file Table_1.xlsx]

## Sheet: Sheet1
Name	Sequence	Reference
EPSF1	5’- ATGTTGGACGCTCTCAGAACTCTTGGT- 3’	(Gaines et al. 2010)
EPSR8	5’- TGAATTTCCTCCAGCAACGGCAA-3’	(Gaines et al. 2010)
ALS_F3	5’- CGCTGCTGCTCAAGGCTACGCTCG-3’,	Modified from (Gaines et al. 2010)
ALS_R3	5’- GCGGGACTGAGTCAAGAAGTGCATC-3’	Modified from (Gaines et al. 2010)
ApCPS-F	5’-TGCGGCAATTTTAAGAGCAT-3	(Kaundun et al. 2019)
ApCPS-R	5’-GATGAGCTGAAGATTGAACAACCT-3’	(Kaundun et al. 2019)
