# Supplementary material for: Fitness Cost Associated With Enhanced EPSPS Gene Copy Number and Glyphosate Resistance in an Amaranthus tuberculatus Population
Source: Front Plant Sci. 2021 Jun 29;12:651381. doi: 10.3389/fpls.2021.651381 (PMC8276266; doi:10.3389/fpls.2021.651381)
Supplement: Supplementary Table 2 — p values for LD50 value student t-test comparison between each seed family. Bold text indicates a non-significant difference between seed families. Families are ordered left to right from most susceptible to most resistant. [file Table_2.xlsx]

## Sheet: Sheet1
	Susceptible						Resistant
	Field sensitive	29	153	141	315	90	1
Field sensitive
29	0.011
153	0.001	0.306
141	0	0.019	0.275
315	0	0	0.008	0.053
90	0	0	0.006	0.034	0.716
1	0	0	0	0	0.03	0.073
